# Supplementary material for: Correlation between the Dimensions and Piezoelectric Properties of ZnO Nanowires Grown by PLI-MOCVD with Different Flow Rates
Source: MDPI journal article supplement (doi:10.3390/nanoenergyadv3030011), 2023-08-02
Supplement: s1 [file s1]

Archive with 1 entries (1 files):
- nanoenergyadv-2485114-supplementary.pdf
